# Supplementary material for: Association Between Preterm-Birth Phenotypes and Differential Morbidity, Growth, and Neurodevelopment at Age 2 Years: Results From the INTERBIO-21st Newborn Study
Source: PubMed Central journal article supplement (PMC7922239; doi:10.1001/jamapediatrics.2020.6087), 2021-03-01

## Supplementary Online Content

Villar J, Restrepo-Méndez MC, McGready R, et al. Association between preterm-birth phenotypes and differential morbidity, growth, and neurodevelopment at age 2 years: results from the INTERBIO-21st Newborn Study. *JAMA Pediatr*. Published online March 1, 2021.  
doi:10.1001/jamapediatrics.2020.6087

**eTable 1.** Definitions of Preterm-Birth Phenotypes

**eTable 2.** Baseline Characteristics and Perinatal Events According to Preterm-Birth Phenotypes

**eTable 3.** Distribution of Preterm-Birth Phenotypes According to the Main Maternal, Fetal, or Placental Conditions

**eTable 4.** Median, 25th Centile, and 75th Centile z Scores at Birth and Ages 1 and 2 Years According to Preterm-Birth Phenotype

**eTable 5.** Morbidity of Children Over the First Year of Age According to Preterm-Birth Phenotype Compared With Term Newborn Group

**eFigure 1.** Study Flowchart of the INTERBIO-21st Newborn Study

**eFigure 2.** Risk Factors According to Preterm-Birth Phenotype: Adjusted Odds Ratios and 95% CIs for Preterm-Birth Phenotypes Compared With Term Newborn Group

**eFigure 3.** Birth Weight Lower Than the 10th Centile of the International INTERGROWTH-21st Newborn Size Standards and Very Preterm Size on Birth Reference Charts According to Preterm-Birth Phenotype

This supplementary material has been provided by the authors to give readers additional information about their work.

**eTable 1.** Definitions of Preterm-Birth Phenotypes

| Preterm phenotypes         | Conditions                                               | Definition                                                                                                                                                                                                                                                                                             |
|----------------------------|----------------------------------------------------------|--------------------------------------------------------------------------------------------------------------------------------------------------------------------------------------------------------------------------------------------------------------------------------------------------------|
| No main condition detected | No conditions detected                                   | No main maternal, fetal or placental condition detected.                                                                                                                                                                                                                                               |
| Mostly preeclampsia        | Preeclampsia                                             | Defined as elevated blood pressure ( $\geq 140/90$ mm Hg), 30 mm Hg increase of systolic pressure, or 15 mm Hg increase of diastolic pressure in relation to basal measurements observed at least twice, the interval of the measurements being $>4$ h but $<168$ h and proteinuria $>2+$ by dipstick. |
|                            | Eclampsia                                                | Defined as the occurrence of seizures (grand mal type) and/or coma, not related to cerebral problems, in women who presented with signs of preeclampsia. Symptoms might have occurred before or during labor or within 48 h after delivery.                                                            |
|                            | HELLP syndrome                                           | HELLP or any other coagulation abnormalities reported from a pregnant woman with preeclampsia or eclampsia.                                                                                                                                                                                            |
|                            | Third trimester bleeding and preeclampsia                | Vaginal bleeding occurring $>27^{+0}$ weeks' gestation in women diagnosed as having severe preeclampsia, eclampsia or HELLP syndrome.                                                                                                                                                                  |
| Mostly infection-related   | Extrauterine infection during the index pregnancy        | Presence of at least one of the following: malaria, pyelonephritis, sexually transmitted diseases (including syphilis and HIV/AIDS), and other clinically documented infections that required use of antibiotics or other treatments during pregnancy, except when antibiotics were used for PPROM.    |
|                            | Clinical chorioamnionitis                                | Cases where antibiotic treatment was specifically indicated for PPROM or diagnosed/treated cases reported for a woman or documented in the medical records. Suspected chorioamnionitis cases with intact membranes were not possible to identify in this data set.                                     |
|                            | Fetal inflammatory response syndrome or perinatal sepsis | Signs, symptoms, and laboratory results compatible with perinatal sepsis documented by the neonatologist (systemic illness with bacteremia).                                                                                                                                                           |
|                            | Fetal anemia                                             | For example, due to fetal hemolytic disease; Rhesus negative.                                                                                                                                                                                                                                          |

| <b>Preterm phenotypes</b>        | <b>Conditions</b>                                                    | <b>Definition</b>                                                                                                                                                                                                                                                                                                                                                                                                                                                                                                                                                                                                                                                                                                                                                                                                                                                                                                                             |
|----------------------------------|----------------------------------------------------------------------|-----------------------------------------------------------------------------------------------------------------------------------------------------------------------------------------------------------------------------------------------------------------------------------------------------------------------------------------------------------------------------------------------------------------------------------------------------------------------------------------------------------------------------------------------------------------------------------------------------------------------------------------------------------------------------------------------------------------------------------------------------------------------------------------------------------------------------------------------------------------------------------------------------------------------------------------------|
| Mostly bleeding-related          | Early bleeding                                                       | Vaginal bleeding <15 <sup>+0</sup> weeks' gestation.                                                                                                                                                                                                                                                                                                                                                                                                                                                                                                                                                                                                                                                                                                                                                                                                                                                                                          |
|                                  | Mid/late-pregnancy bleeding                                          | Vaginal bleeding ≥15 <sup>+0</sup> weeks' gestation without the diagnosis of preeclampsia, eclampsia or HELLP syndrome.                                                                                                                                                                                                                                                                                                                                                                                                                                                                                                                                                                                                                                                                                                                                                                                                                       |
| Mostly suspected IUGR            | Suspicion or diagnosis of intrauterine growth restriction            | Suspicion of impaired fetal growth during pregnancy based on ultrasound examinations or physical examination, and specifically stated in the medical record                                                                                                                                                                                                                                                                                                                                                                                                                                                                                                                                                                                                                                                                                                                                                                                   |
| Mostly fetal distress            | Fetal distress                                                       | Diagnosis based on: (1) abnormal antepartum nonstress test reported in the medical record as indication for induction of labor or elective Cesarean delivery or (2) severe intrapartum electronic fetal monitoring pattern equivalent to category 3 of NICHD as indication for intrapartum Cesarean delivery                                                                                                                                                                                                                                                                                                                                                                                                                                                                                                                                                                                                                                  |
| Mostly severe maternal condition | Severe maternal disease clinically active during the index pregnancy | Cases with a relevant clinical condition documented in the medical records in which birth was caregiver initiated because of the severity or complications related to these conditions. This excludes cases in which there was also an obstetric reason for induction/Cesarean delivery. Clinical conditions associated with caregiver-initiated preterm birth included diabetes mellitus, thyroid disease, other endocrine diseases, cardiac disease, hypertension previous to pregnancy, chronic respiratory disease (including chronic asthma), renal disease, cancer, lupus erythematosus, any coagulopathy (including falciparum anemia), tuberculosis, severe intestinal malabsorption (including Crohn's and celiac diseases), maternal congenital abnormality or genetic disease (eg, cystic fibrosis or cardiac congenital defects), epilepsy, or any other clinical condition that required surgery or referral to specialized care |
| Mostly congenital anomaly        | Fetal anomaly                                                        | Severe anomalies diagnosed through ultrasound in pregnancy or on neonatal examination                                                                                                                                                                                                                                                                                                                                                                                                                                                                                                                                                                                                                                                                                                                                                                                                                                                         |

**Notes:**

HELLP: hemolysis, elevated liver enzymes, low platelet

HIV: human immunodeficiency virus

NICHD: National Institute of Child Health and Human Development

PPROM: preterm premature rupture of membranes.

**eTable 2.** Baseline Characteristics and Perinatal Events According to Preterm-Birth Phenotypes

|                                       | NMCD* |     | Preeclampsia* |      | Infections* |     | Bleeding* |     | IUGR* |     | Fetal distress* |      | Severe maternal disease* |     | Congenital anomaly* |      | All preterm newborns* |     | Term newborn group* |     |
|---------------------------------------|-------|-----|---------------|------|-------------|-----|-----------|-----|-------|-----|-----------------|------|--------------------------|-----|---------------------|------|-----------------------|-----|---------------------|-----|
|                                       | n=485 |     | n=162         |      | n=289       |     | n=71      |     | n=110 |     | n=131           |      | n=85                     |     | n=48                |      | n = 1381              |     | n = 5148            |     |
| Maternal age, years                   | 28.7  | 0.3 | 29.8          | 0.5  | 29.0        | 0.4 | 29.8      | 0.6 | 28.8  | 0.5 | 30.0            | 0.5  | 30.3                     | 0.7 | 30.7                | 0.9  | 29.3                  | 0.2 | 29.3                | 0.1 |
| Maternal height, cm                   | 158.1 | 0.4 | 160.5         | 0.5  | 158.7       | 0.5 | 162.4     | 0.9 | 159.5 | 0.7 | 160.5           | 0.6  | 160.9                    | 0.9 | 159.2               | 0.9  | 159.3                 | 0.2 | 159.8               | 0.1 |
| Maternal weight, kg                   | 62.6  | 0.7 | 71.8          | 1.4  | 62.1        | 0.9 | 66.9      | 1.8 | 63.9  | 1.4 | 69.2            | 1.4  | 66.8                     | 1.8 | 62.1                | 2.3  | 64.8                  | 0.4 | 63.9                | 0.2 |
| Body-mass index, kg/m <sup>2</sup>    | 25.0  | 0.2 | 27.8          | 0.5  | 24.5        | 0.3 | 25.2      | 0.6 | 25.1  | 0.5 | 26.8            | 0.5  | 25.8                     | 0.6 | 24.4                | 0.8  | 25.4                  | 0.1 | 24.9                | 0.1 |
| Gestational age at first visit, weeks | 14.4  | 0.2 | 13.9          | 0.3  | 13.9        | 0.3 | 13.7      | 0.4 | 13.3  | 0.3 | 13.6            | 0.3  | 13.2                     | 0.4 | 13.9                | 0.6  | 14.0                  | 0.1 | 13.4                | 0.1 |
| Gestational age at birth, weeks       | 34.9  | 0.1 | 34.0          | 0.2  | 33.9        | 0.2 | 33.8      | 0.3 | 34.8  | 0.2 | 33.9            | 0.2  | 34.8                     | 0.2 | 33.9                | 0.4  | 34.4                  | 0.1 | 39.4                | 0.0 |
| Years of formal education, years      | 10.4  | 0.3 | 12.5          | 0.4  | 11.1        | 0.3 | 13.1      | 0.5 | 13.8  | 0.4 | 12.9            | 0.3  | 12.8                     | 0.5 | 10.5                | 0.9  | 11.6                  | 0.1 | 11.8                | 0.1 |
| Married or cohabiting                 | 43    | 9%  | 9             | 6%   | 36          | 12% | 5         | 7%  | 12    | 11% | 27              | 21%  | 11                       | 13% | 6                   | 13%  | 149                   | 11% | 489                 | 9%  |
| Nulliparous                           | 202   | 42% | 79            | 49%  | 131         | 45% | 22        | 31% | 51    | 46% | 65              | 50%  | 38                       | 45% | 20                  | 42%  | 608                   | 44% | 2049                | 40% |
| Pre-eclampsia                         | 0     | 0%  | 162           | 100% | 6           | 2%  | 0         | 0%  | 21    | 19% | 28              | 21%  | 0                        | 0%  | 5                   | 10%  | 222                   | 16% | 132                 | 3%  |
| Pyelonephritis                        | 0     | 0%  | 3             | 2%   | 12          | 4%  | 0         | 0%  | 1     | 1%  | 3               | 2%   | 0                        | 0%  | 1                   | 2%   | 20                    | 1%  | 44                  | 1%  |
| Any sexually transmitted infection    | 7     | 1%  | 2             | 1%   | 5           | 2%  | 2         | 3%  | 1     | 1%  | 0               | 0.0% | 5                        | 6%  | 0                   | 0.0% | 22                    | 2%  | 119                 | 2%  |

\* Data are mean (SD) or number (%). IUGR: intrauterine growth restriction; NMCD: no main condition detected.

|                                      | NMCD* |      | Preeclampsia* |      | Infections* |      | Bleeding* |      | IUGR* |      | Fetal distress* |      | Severe maternal disease* |      | Congenital anomaly* |      | All preterm newborns* |      | Term newborn group* |       |
|--------------------------------------|-------|------|---------------|------|-------------|------|-----------|------|-------|------|-----------------|------|--------------------------|------|---------------------|------|-----------------------|------|---------------------|-------|
|                                      | n=485 |      | n=162         |      | n=289       |      | n=71      |      | n=110 |      | n=131           |      | n=85                     |      | n=48                |      | n = 1381              |      | n = 5148            |       |
| Spontaneous initiation of labour     | 363   | 75 % | 17            | 10%  | 188         | 65 % | 18        | 25 % | 9     | 8%   | 38              | 29 % | 18                       | 21 % | 30                  | 63 % | 681                   | 49 % | 3179                | 62%   |
| PPROM                                | 131   | 27 % | 11            | 7%   | 174         | 60 % | 14        | 20 % | 8     | 7%   | 30              | 23 % | 32                       | 38 % | 17                  | 35 % | 417                   | 30 % | 413                 | 8%    |
| Caesarean section                    | 163   | 34 % | 124           | 77%  | 78          | 27 % | 61        | 86 % | 76    | 69 % | 123             | 94 % | 55                       | 65 % | 16                  | 33 % | 696                   | 50 % | 1778                | 35%   |
| NICU admission >1 day                | 185   | 38 % | 101           | 62%  | 200         | 69 % | 51        | 72 % | 63    | 57 % | 86              | 66 % | 38                       | 45 % | 31                  | 65 % | 755                   | 55 % | 380                 | 7%    |
| LBW (<2500g)                         | 285   | 59 % | 115           | 71%  | 205         | 71 % | 50        | 70 % | 107   | 97 % | 100             | 76 % | 48                       | 56 % | 37                  | 77 % | 947                   | 69 % | 247                 | 5%    |
| Neonatal mortality                   | 17    | 4%   | 14            | 9%   | 8           | 3%   | 4         | 6%   | 1     | 1%   | 5               | 4%   | 2                        | 2%   | 4                   | 8%   | 55                    | 4%   | 8                   | 0.2 % |
| Male sex                             | 247   | 51 % | 69            | 43%  | 151         | 52 % | 42        | 59 % | 54    | 49 % | 65              | 50 % | 47                       | 55 % | 28                  | 58 % | 703                   | 51 % | 2609                | 51%   |
| Exclusive breastfeeding at discharge | 381   | 79 % | 89            | 55%  | 173         | 60 % | 32        | 45 % | 48    | 44 % | 75              | 57 % | 50                       | 59 % | 18                  | 38 % | 866                   | 63 % | 4439                | 86%   |
| Mother admitted to ICU               | 4     | 1%   | 6             | 4%   | 1           | 0%   | 1         | 1%   | 1     | 1%   | 2               | 2%   | 2                        | 2%   | 0                   | 0%   | 17                    | 1%   | 21                  | 0.4 % |
| Birth weight, g                      | 2363  | 23.9 | 2099          | 54.1 | 2186        | 33.0 | 2198      | 63.8 | 1831  | 36.0 | 2079            | 62.6 | 2358                     | 56.4 | 2152                | 96.5 | 2210                  | 15.9 | 3200                | 6.2   |
| Birth length, cm                     | 45.4  | 0.1  | 44.4          | 0.3  | 44.5        | 0.2  | 44.4      | 0.4  | 42.7  | 0.3  | 43.8            | 0.4  | 45.3                     | 0.3  | 43.8                | 0.5  | 44.6                  | 0.1  | 48.9                | 0.0   |
| Birth head circumference, cm         | 31.7  | 0.1  | 31.3          | 0.2  | 31.1        | 0.1  | 30.9      | 0.3  | 30.2  | 0.2  | 30.8            | 0.3  | 31.8                     | 0.2  | 31.0                | 0.4  | 31.3                  | 0.1  | 33.9                | 0.0   |

\* Data are mean (SD) or number (%). IUGR: intrauterine growth restriction; NMCD: no main condition detected. PPROM=preterm prelabor rupture of membranes; NICU=neonatal intensive care unit; LBW=low birthweight; ICU=intensive care unit.

**eTable 3.** Distribution of Preterm-Birth Phenotypes According to the Main Maternal, Fetal, or Placental Conditions

| Preterm phenotype<br>(Main condition)                              | Preterm newborns <37 <sup>+0</sup> weeks' gestation |            |                  |                                                                                                                                                                        |
|--------------------------------------------------------------------|-----------------------------------------------------|------------|------------------|------------------------------------------------------------------------------------------------------------------------------------------------------------------------|
|                                                                    | N                                                   | %          | % Main condition | Most frequent associated conditions (%)                                                                                                                                |
| <b>No main condition detected</b> (NMCD)                           | 485                                                 | 35         | 0                | None                                                                                                                                                                   |
| <b>Preeclampsia</b><br>(Mostly preeclampsia)                       | 162                                                 | 12         | 100              | Perinatal sepsis (16)<br>Extrauterine infection (11)<br>Suspected IUGR (9)                                                                                             |
| <b>Infections</b><br>(Mostly infection-related‡)                   | 289                                                 | 21         | 100              | Chorioamnionitis (48)<br>Extrauterine infection (39)<br>Perinatal sepsis (35)                                                                                          |
| <b>Bleeding</b><br>(Mostly bleeding-related #)                     | 71                                                  | 5          | 100              | Severe maternal condition (30)<br>Perinatal sepsis (24)<br>Chorioamnionitis (10)<br>Extrauterine infection (9)                                                         |
| <b>IUGR</b><br>(Mostly suspected IUGR)                             | 110                                                 | 8          | 100              | Severe maternal condition (34)<br>Preeclampsia (19)<br>Perinatal sepsis (10)<br>Extrauterine infection (8)<br>Mid-late pregnancy bleeding (8)                          |
| <b>Fetal distress</b><br>(Mostly fetal distress)                   | 131                                                 | 9          | 100              | Preeclampsia (21)<br>Extrauterine infection (21)<br>Suspected IUGR (20)<br>Severe maternal condition (18)<br>Perinatal sepsis (15)<br>Mid-late pregnancy bleeding (12) |
| <b>Severe maternal disease</b><br>(Mostly severe maternal disease) | 85                                                  | 6          | 66               | Early bleeding (45)<br>Extrauterine infection (24)<br>Mid-late pregnancy bleeding (11)<br>Suspected IUGR (8)                                                           |
| <b>Congenital anomaly</b><br>(Mostly congenital anomaly)           | 48                                                  | 4          | 100              | Perinatal sepsis (31)<br>Chorioamnionitis (25)<br>Extrauterine infection (23)<br>Suspected IUGR (13)<br>Early bleeding (13)                                            |
| <b>Total</b>                                                       | <b>1381</b>                                         | <b>100</b> |                  |                                                                                                                                                                        |

‡ This preterm phenotype was generated by merging extrauterine infection, chorioamnionitis and perinatal sepsis phenotypic clusters. In addition, fetal anaemia cases were included in this group as the majority of cases (64%) were associated with perinatal sepsis.

# This preterm phenotype was generated by merging mid-late pregnancy bleeding (without preeclampsia; hemolysis, elevated liver enzymes and low platelet count (HELLP) or eclampsia) and early bleeding phenotype clusters.

IUGR: Intrauterine growth restriction. Main condition: Predominant condition within each cluster.

**eTable 4.** Median, 25th Centile, and 75th Centile z Scores at Birth and Ages 1 and 2 Years According to Preterm-Birth Phenotype

| At birth                | N    | Weight |      |      | Length |      |      | Head circumference |      |      | Weight-for-length |      |      |
|-------------------------|------|--------|------|------|--------|------|------|--------------------|------|------|-------------------|------|------|
|                         |      | Median | 25th | 75th | Median | 25th | 75th | Median             | 25th | 75th | Median            | 25th | 75th |
| NMCD                    | 485  | -0.2   | -0.8 | 0.4  | -0.3   | -0.9 | 0.5  | -0.1               | -0.8 | 0.6  | -0.2              | -0.7 | 0.3  |
| Pre-eclampsia           | 162  | -0.7   | -1.3 | 0.4  | -0.4   | -1.1 | 0.3  | -0.2               | -1.0 | 0.7  | -0.5              | -1.3 | 0.4  |
| Infections              | 289  | -0.1   | -0.7 | 0.5  | -0.2   | -0.9 | 0.3  | -0.2               | -0.7 | 0.7  | -0.2              | -0.7 | 0.4  |
| Bleeding                | 71   | -0.1   | -0.6 | 0.6  | -0.2   | -0.7 | 0.5  | -0.1               | -0.5 | 0.5  | -0.2              | -0.5 | 0.5  |
| IUGR                    | 110  | -1.6   | -2.1 | -1.1 | -1.7   | -2.4 | -1.0 | -1.1               | -1.9 | -0.7 | -1.6              | -2.1 | -1.0 |
| Fetal distress          | 131  | -0.4   | -1.4 | 0.3  | -0.6   | -1.3 | 0.2  | -0.4               | -1.2 | 0.5  | -0.4              | -1.3 | 0.2  |
| Severe maternal disease | 84   | -0.1   | -0.5 | 0.5  | -0.2   | -0.9 | 0.5  | 0.1                | -0.8 | 0.9  | -0.1              | -0.5 | 0.4  |
| Congenital anomaly      | 48   | 0.0    | -0.7 | 0.5  | -0.3   | -1.1 | 0.2  | -0.2               | -1.1 | 0.5  | 0.0               | -0.8 | 0.5  |
| All preterm newborns    | 1380 | -0.3   | -1.0 | 0.4  | -0.4   | -1.1 | 0.3  | -0.2               | -1.0 | 0.5  | -0.3              | -0.9 | 0.3  |
| Term newborn group      | 5148 | -0.2   | -0.8 | 0.5  | -0.2   | -0.9 | 0.5  | 0.1                | -0.6 | 0.8  | -0.2              | -0.8 | 0.5  |

NMCD: no main condition detected  
IUGR: intrauterine growth restriction

| At 1 year               | N    | Weight |      |      | Length |      |      | Head circumference |      |      | Weight-for-length |      |      |
|-------------------------|------|--------|------|------|--------|------|------|--------------------|------|------|-------------------|------|------|
|                         |      | Median | 25th | 75th | Median | 25th | 75th | Median             | 25th | 75th | Median            | 25th | 75th |
| NMCD                    | 286  | -0.3   | -1.3 | 0.4  | -1.0   | -2.0 | -0.1 | -0.4               | -1.5 | 0.5  | 0.1               | -0.7 | 0.9  |
| Pre-eclampsia           | 95   | 0.0    | -0.9 | 0.5  | -0.7   | -1.6 | -0.1 | 0.0                | -0.8 | 0.7  | 0.4               | -0.4 | 1.0  |
| Infections              | 139  | -0.4   | -1.3 | 0.4  | -1.1   | -1.9 | -0.3 | -0.4               | -1.2 | 0.5  | 0.1               | -0.5 | 0.9  |
| Bleeding                | 40   | -0.3   | -0.9 | 0.4  | -0.6   | -1.2 | 0.3  | -0.2               | -1.2 | 0.6  | 0.1               | -0.5 | 0.8  |
| IUGR                    | 48   | -1.1   | -1.8 | -0.2 | -1.3   | -2.1 | -0.9 | -1.2               | -1.8 | -0.4 | -0.7              | -1.5 | 0.4  |
| Fetal distress          | 72   | -0.3   | -1.1 | 0.5  | -1.5   | -2.2 | -0.3 | 0.0                | -1.1 | 0.4  | 0.4               | -0.6 | 1.3  |
| Severe maternal disease | 48   | 0.2    | -0.6 | 0.8  | -0.5   | -1.4 | 0.1  | 0.0                | -0.7 | 0.7  | 0.5               | -0.2 | 0.9  |
| Congenital anomaly      | 19   | -0.2   | -2.0 | 0.5  | -1.2   | -1.9 | -0.8 | -0.8               | -2.4 | 0.2  | -0.2              | -1.3 | 1.2  |
| All preterm newborns    | 747  | -0.3   | -1.2 | 0.4  | -1.0   | -1.9 | -0.2 | -0.3               | -1.2 | 0.5  | 0.2               | -0.7 | 0.9  |
| Term newborn group      | 3372 | 0.0    | -0.8 | 0.8  | -0.4   | -1.2 | 0.4  | 0.0                | -0.8 | 0.8  | 0.3               | -0.5 | 1.1  |

NMCD: no main condition detected  
IUGR: intrauterine growth restriction

| At 2 years              | N    | Weight |      |      | Length |      |      | Head circumference |      |      | Weight-for-length |      |      |
|-------------------------|------|--------|------|------|--------|------|------|--------------------|------|------|-------------------|------|------|
|                         |      | Median | 25th | 75th | Median | 25th | 75th | Median             | 25th | 75th | Median            | 25th | 75th |
| NMCD                    | 280  | -0.4   | -1.4 | 0.6  | -0.6   | -1.6 | 0.3  | -0.2               | -1.3 | 0.6  | 0.0               | -0.9 | 0.9  |
| Pre-eclampsia           | 92   | -0.1   | -0.8 | 0.7  | -0.3   | -1.1 | 0.4  | 0.2                | -0.6 | 0.8  | 0.1               | -0.7 | 1.0  |
| Infections              | 146  | -0.3   | -1.0 | 0.5  | -0.8   | -1.7 | 0.1  | -0.3               | -1.2 | 0.6  | 0.1               | -0.6 | 0.7  |
| Bleeding                | 44   | 0.0    | -0.6 | 0.7  | -0.3   | -0.8 | 0.6  | -0.4               | -1.2 | 0.7  | 0.1               | -0.4 | 0.8  |
| IUGR                    | 46   | -0.9   | -1.7 | -0.1 | -0.9   | -1.7 | -0.5 | -1.0               | -1.5 | -0.2 | -0.4              | -1.3 | 0.2  |
| Fetal distress          | 73   | -0.3   | -1.2 | 0.6  | -0.7   | -1.5 | 0.3  | -0.2               | -1.2 | 0.9  | 0.1               | -0.8 | 1.0  |
| Severe maternal disease | 54   | 0.1    | -0.5 | 1.1  | -0.2   | -1.1 | 0.6  | -0.3               | -0.8 | 0.6  | 0.2               | -0.4 | 0.8  |
| Congenital anomaly      | 29   | -0.5   | -1.7 | 0.9  | -1.2   | -1.7 | 0.2  | -1.0               | -1.8 | 0.3  | -0.2              | -1.2 | 1.4  |
| All preterm newborns    | 764  | -0.3   | -1.1 | 0.6  | -0.6   | -1.5 | 0.3  | -0.2               | -1.2 | 0.6  | 0.1               | -0.8 | 0.8  |
| Term newborn group      | 3157 | 0.0    | -0.8 | 0.8  | -0.3   | -1.1 | 0.6  | 0.0                | -0.9 | 0.8  | 0.1               | -0.6 | 0.9  |

NMCD: no main condition detected  
IUGR: intrauterine growth restriction



**eTable 5.** Morbidity of Children Over the First Year of Age According to Preterm-Birth Phenotype Compared With Term Newborn Group

|                         | N    | Hospitalized at least once |             |        | Infections (at least 3) |             |       | Neurologic disorders |             |        | Severe clinical condition |             |        |
|-------------------------|------|----------------------------|-------------|--------|-------------------------|-------------|-------|----------------------|-------------|--------|---------------------------|-------------|--------|
|                         |      | OR                         | 95% CI      |        | OR                      | 95% CI      |       | OR                   | 95% CI      |        | OR                        | 95% CI      |        |
| NMCD                    | 289  | 2.2                        | 1.8         | - 2.7  | 1.0                     | 0.6         | - 1.5 | 4.6                  | 2.1         | - 9.8  | 1.2                       | 0.9         | - 1.6  |
| Preeclampsia            | 95   | 1.8                        | 1.1         | - 3.2  | 1.9                     | 1.5         | - 2.6 | 1.6                  | 0.5         | - 5.2  | 1.1                       | 0.7         | - 2.0  |
| Infections              | 141  | 3.4                        | 2.3         | - 5.2  | 1.1                     | 0.5         | - 2.3 | 3.4                  | 0.4         | - 30.0 | 1.8                       | 1.3         | - 2.4  |
| Bleeding                | 40   | 1.7                        | 1.0         | - 3.1  | 1.2                     | 0.4         | - 3.8 | 3.5                  | 1.2         | - 10.2 | 2.3                       | 1.2         | - 4.3  |
| IUGR                    | 48   | 1.5                        | 0.6         | - 3.9  | 2.0                     | 1.2         | - 3.3 | 2.8                  | 1.0         | - 7.6  | 1.6                       | 0.9         | - 2.8  |
| Fetal distress          | 73   | 3.7                        | 2.4         | - 5.9  | 1.1                     | 0.7         | - 1.7 | 4.4                  | 1.0         | - 18.9 | 2.2                       | 1.7         | - 2.8  |
| Severe maternal disease | 48   | 1.2                        | 0.6         | - 2.2  | 0.8                     | 0.6         | - 1.1 | 1.0                  | --          | - --   | 1.5                       | 0.7         | - 3.0  |
| Congenital anomaly      | 19   | 6.9                        | 3.4         | - 14.0 | 2.1                     | 0.8         | - 5.6 | 18.0                 | 3.5         | - 91.7 | 6.5                       | 2.8         | - 15.4 |
| All preterm newborns    | 753  | 2.4                        | 1.9         | - 3.0  | 1.2                     | 0.9         | - 1.7 | 3.7                  | 1.8         | - 7.7  | 1.6                       | 1.2         | - 2.1  |
| Term newborn group      | 3397 | 1.0                        | [Reference] |        | 1.0                     | [Reference] |       | 1.0                  | [Reference] |        | 1.0                       | [Reference] |        |

OR: Odds ratio; 95CI%: 95% confidence interval based on robust standard errors. Adjusted for study site.

NMCD: No main condition detected; IUGR: intrauterine growth restriction

Infections include any of the following conditions: Antibiotics ( $\geq 3$  regimens), otitis media, pneumonia, bronchiolitis, parasitosis, diarrhea, vomiting, exanthema, skin disease, fever  $\geq 3$  days ( $\geq 3$  episodes), meningitis, other infections that required antibiotics

Neurologic disorders include any of the following conditions: Seizures, cerebral palsy, other neurologic disorders

Severe clinical condition includes any of the following conditions: Cardiovascular problems, gastroesophageal reflux, any hemolytic condition, injury trauma, any condition that required surgery

**eFigure 1.** Study Flowchart of the INTERBIO-21st Newborn Study

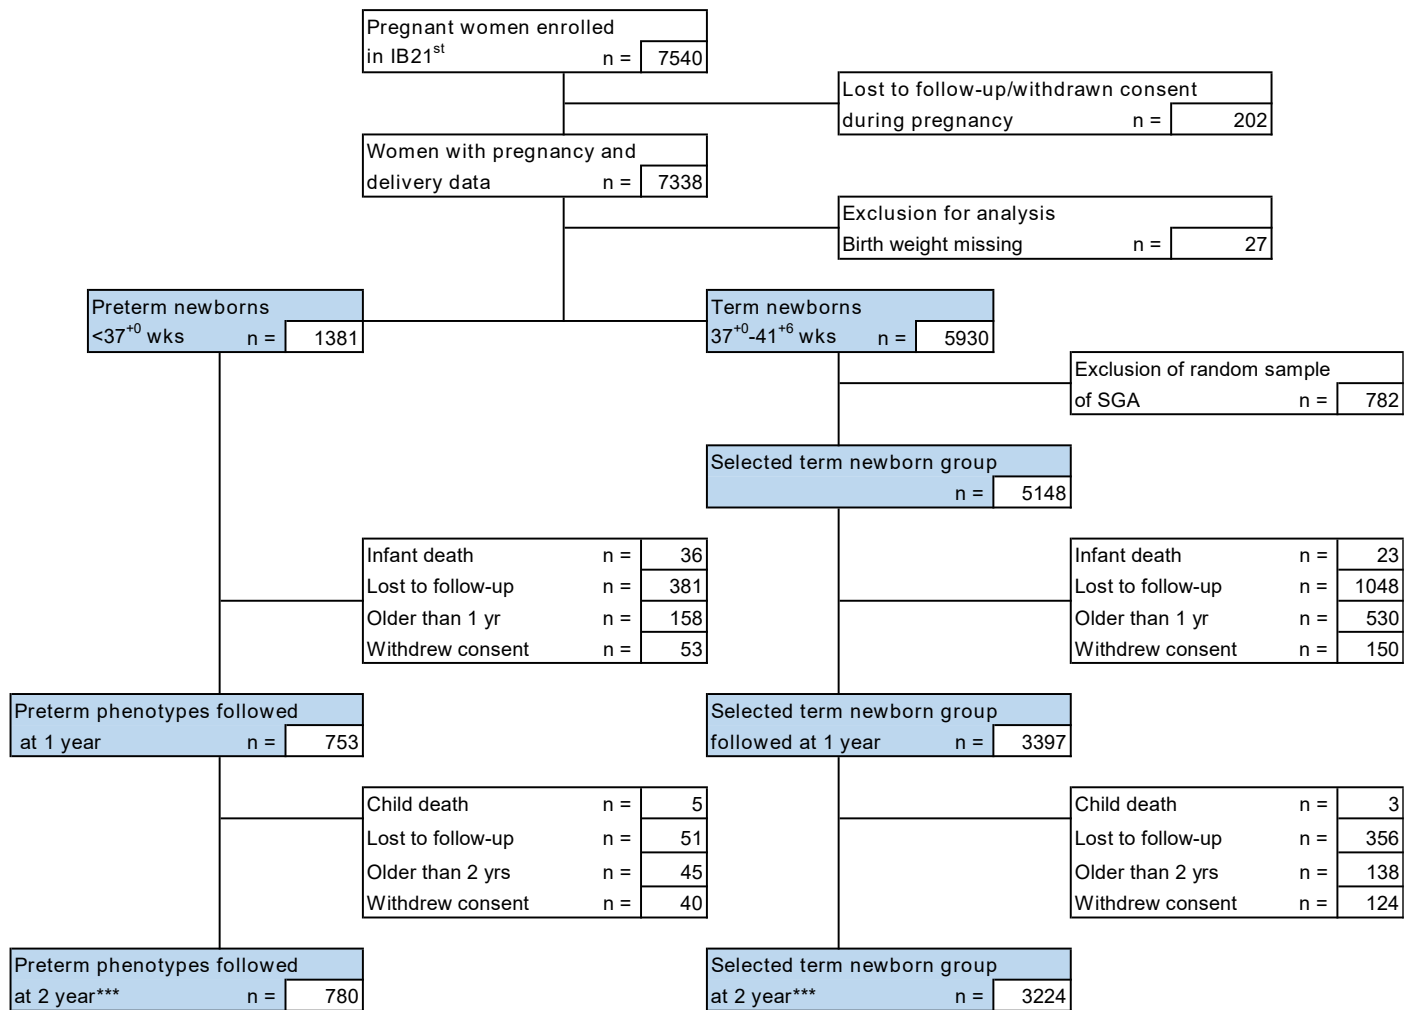

IB21st: INTERBIO-21<sup>st</sup> Study; SGA: Small-for-gestational-age

\*\*\* At 2 years of age, we followed up 168 children born preterm and 448 born term that were not seen at 1 year of age.

**eFigure 2.** Risk Factors According to Preterm-Birth Phenotype: Adjusted Odds Ratios and 95% CIs for Preterm-Birth Phenotypes Compared With Term Newborn Group

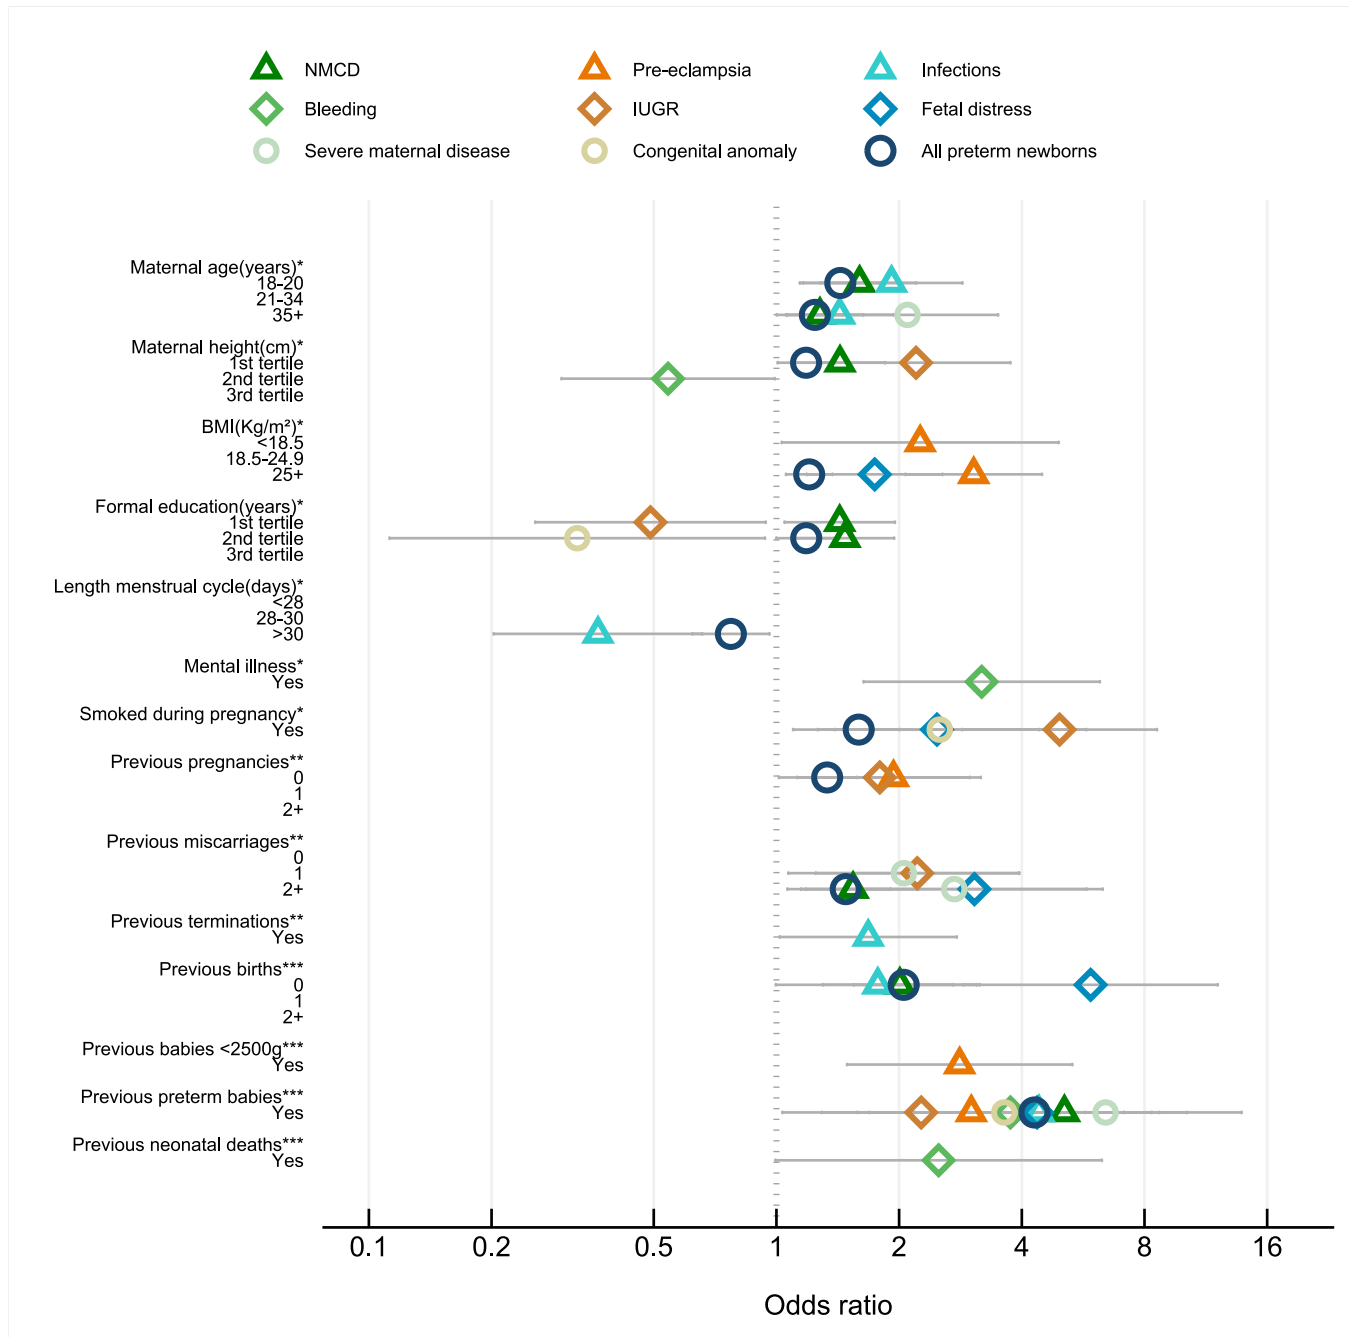

X-axis is in logarithm scale.

IUGR: intrauterine growth restriction; OR: Odds ratio, 95%CI: 95% confidence interval.

Only risk factors with p-values <0.05 and categories which did not include the unit were plotted in the figure.

\* Model 1: Adjusted for maternal age, height, first trimester/pre-pregnancy body mass index (BMI), years of education, manual/physically demanding work, pre-pregnancy mental illness, average menstrual cycle length, smoking during pregnancy

\*\* Model 2: adjusted for Model 1 and number of previous pregnancies, miscarriages and terminations

\*\*\* Model 3: adjusted for Model 2 and number of previous births, low birth weight (LBW) and preterm babies, and neonatal deaths

**eFigure 3.** Birth Weight Lower Than the 10th Centile of the International INTERGROWTH-21st Newborn Size Standards and Very Preterm Size on Birth Reference Charts According to Preterm-Birth Phenotype

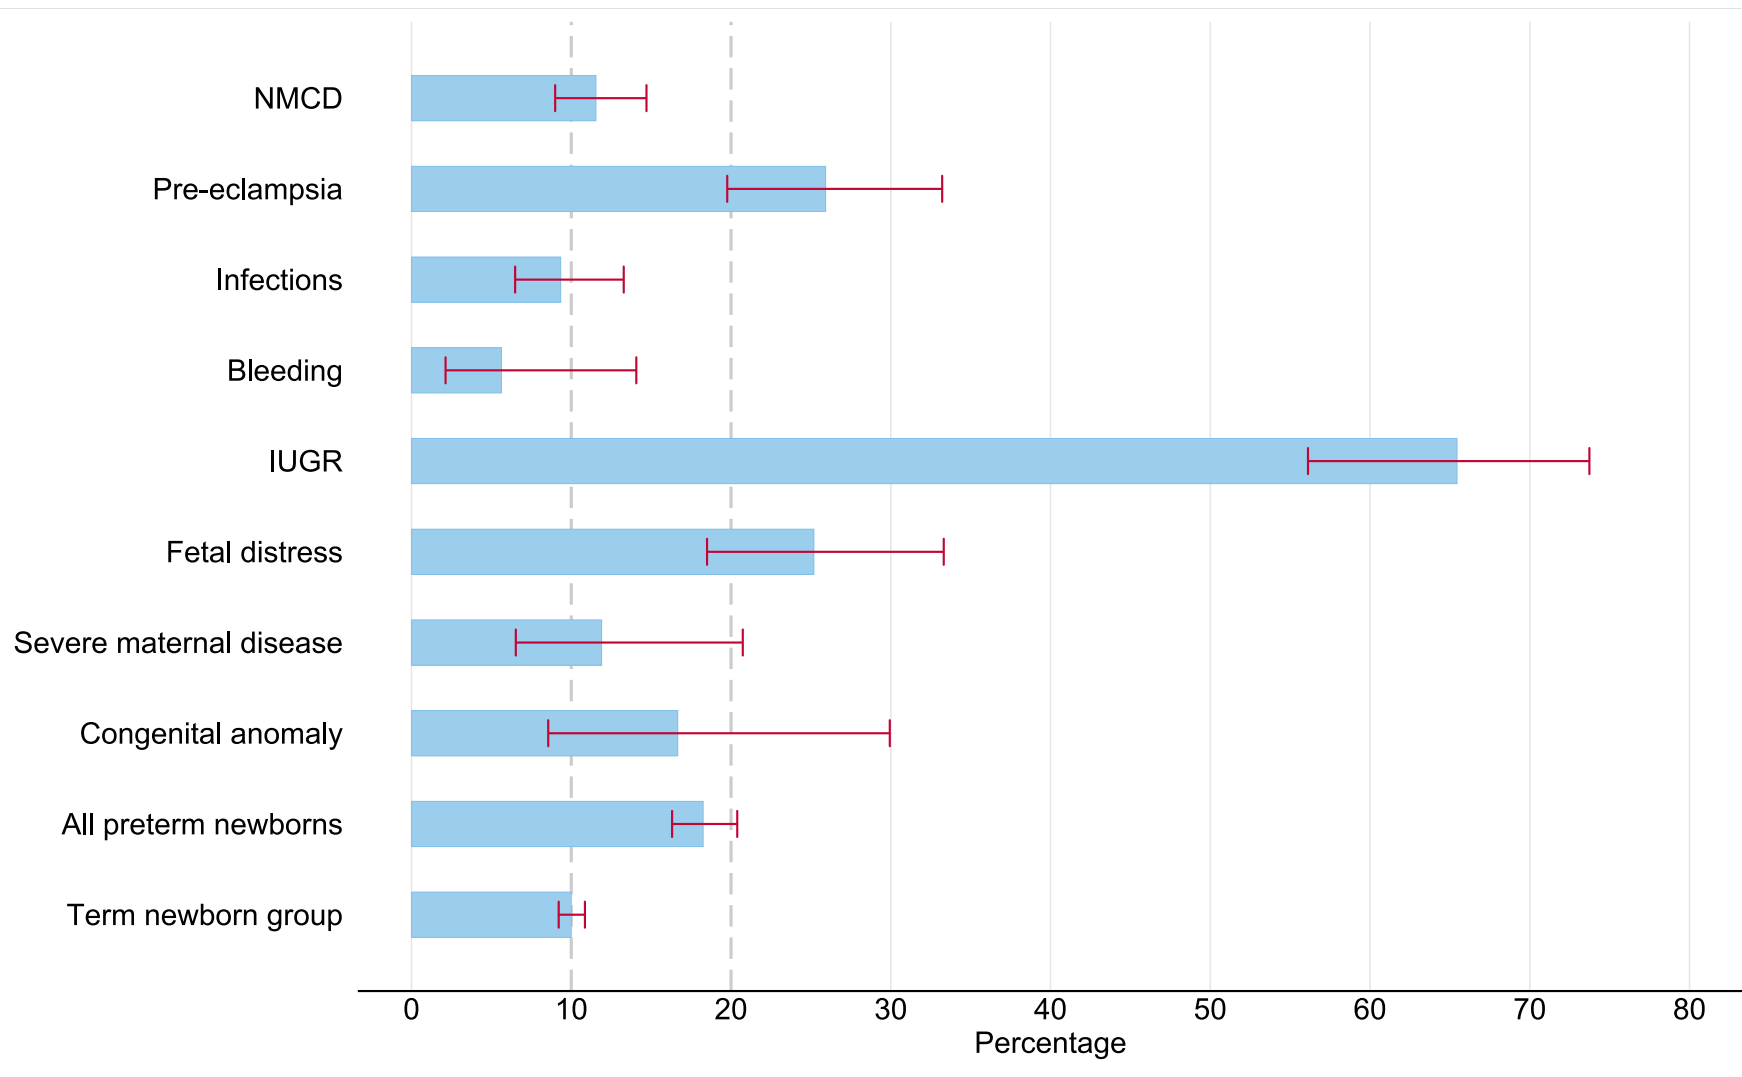

Supplement: jamapediatr-e206087-s001.pdf [file jamapediatr-e206087-s001.pdf]
